# Supplementary material for: Hybrid ionogel electrolytes for high temperature lithium batteries
Source: Royal Society of Chemistry journal article supplement (doi:10.1039/c4ta06062h), 2014-12-02
Supplement: c4ta06062h1.pdf [file c4ta06062h1.pdf]

Supporting Information for:

## Hybrid ionogel electrolytes for high temperature lithium batteries

Jin Hong Lee,<sup>a,b,‡</sup> Albert S. Lee,<sup>a,‡</sup> Jong-Chan Lee,<sup>b</sup> Soon Man Hong,<sup>a,c</sup> Seung Sang Hwang<sup>a,c</sup> and Chong Min Koo<sup>a,c</sup>

<sup>a</sup>Center for Materials Architecturing, Korea Institute of Science and Technology, Hwarangno 14-gil 5, Seong-Buk Gu, Seoul 136-791

<sup>b</sup>Department of Chemical and Biological Engineering, and Institute of Chemical Process, Seoul National University, 599 Gwanak-ro, Gwanak-gu, Seoul 151-744, Republic of Korea

<sup>c</sup>Nanomaterials Science and Engineering, University of Science and Technology, 217 Gajungro, 176 Gajung-dong, Yuseong-Gu, Daejeon 305-333, Republic of Korea

‡These authors contributed equally to this work.

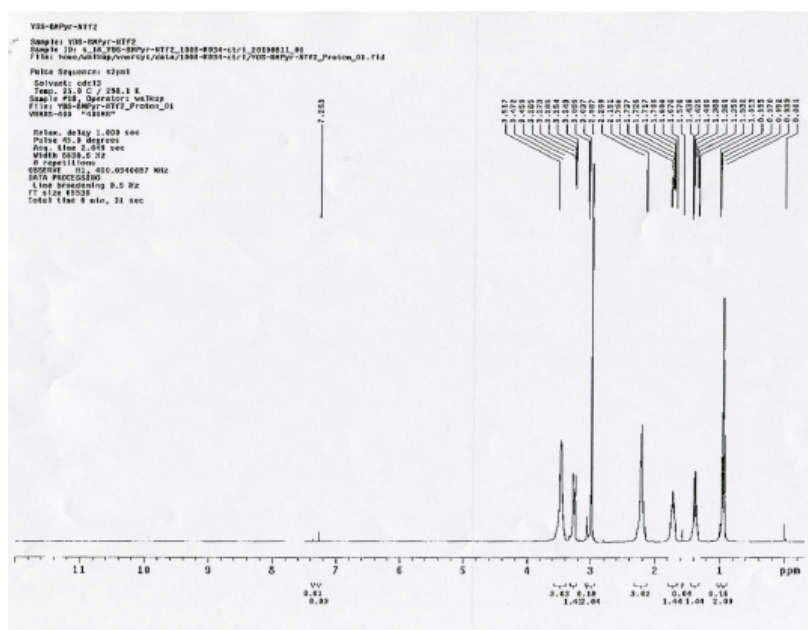

Fig S1.  $^1\text{H}$  NMR of BMPTFSI in  $\text{CDCl}_3$

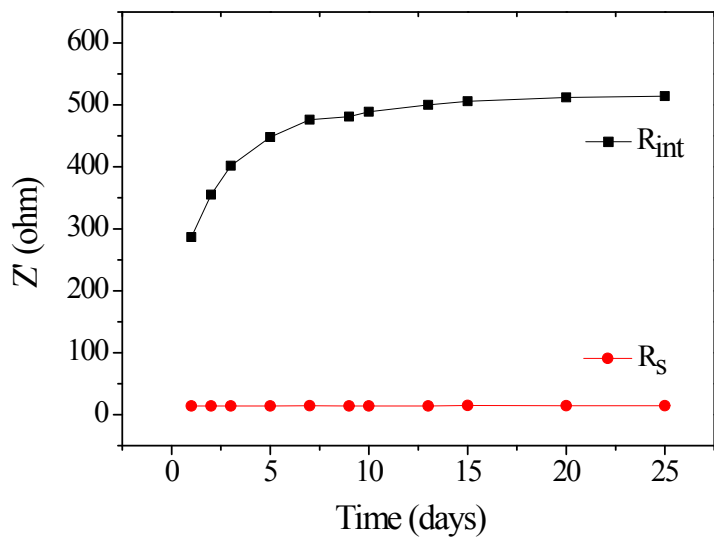

Fig S2. Interfacial Resistance as a function of time

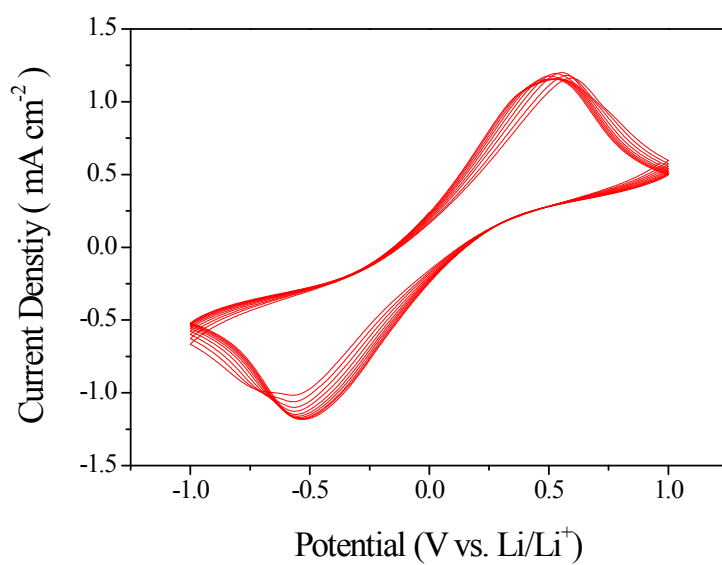

Fig S3. Cyclic Voltammogram for a symmetrical  $\text{Li}/\text{HI-2}/\text{Li}$  cell

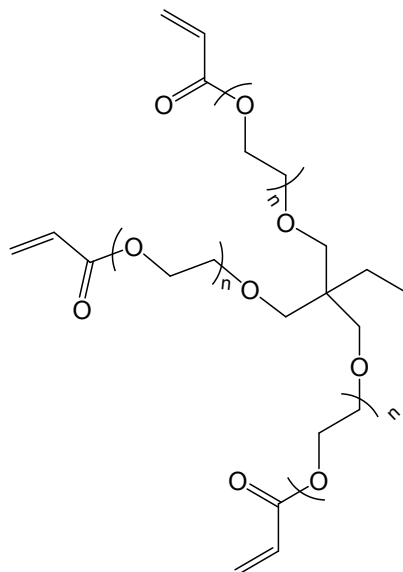

Fig S4. Chemical structure of a well-studied organic crosslinker, ETPTA

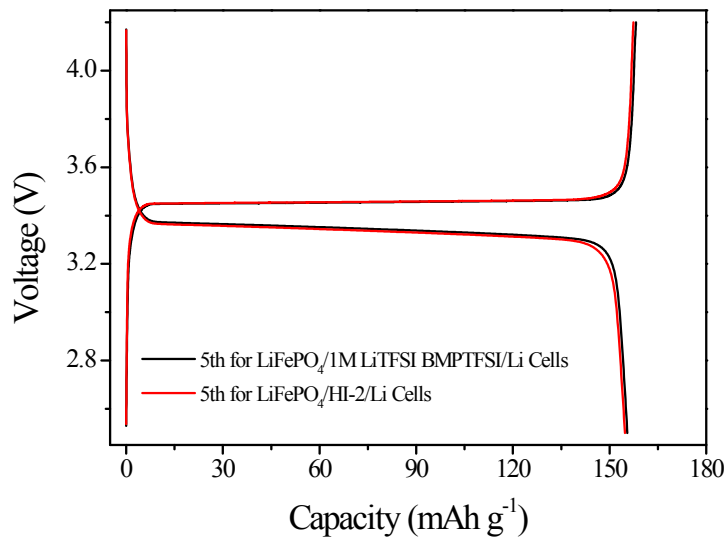

Fig S5. Representative discharge profiles for reference  $\text{LiFePO}_4/1\text{M LiTFSI BMPTFSI/Li}$  Cells at 0.1C charge-0.1C discharge conditions ( $90^\circ\text{C}$ )
